# Supplementary material for: Spin state preference and bond formation/cleavage barriers in ferrous-dioxygen heme adducts: remarkable dependence on methodology
Source: Royal Society of Chemistry journal article supplement (doi:10.1039/c3ra45789c), 2013-01-01
Supplement: c3ra45789c.pdf [file c3ra45789c.pdf]

# Supporting Information

## **Spin State Preference and Bond Formation/Cleavage Barriers in Ferrous-Dioxygen Heme Adducts: Remarkable Dependence on Methodology**

Amr A. A. Attia, Alexandru Lupan, Radu Silaghi-Dumitrescu\*

*Department of Chemistry, "Babes-Bolyai" University, 1 Mihail Kogălniceanu str, Cluj-Napoca,*

*RO-400084. E-mail: rsilaghi@chem.ubbcluj.ro. Phone +40264593833, Fax +40264590818.*

Table S1. Computed geometrical parameters for all dioxygen-bound models (first scanning step//last scanning step) using the M06-2X functional.

Table S2. Computed geometrical parameters for all dioxygen-bound models (first scanning step//last scanning step) using the M06L functional.

Table S3. Computed geometrical parameters for all dioxygen-bound models (first scanning step//last scanning step) using the BP86 functional.

Table S4. Atomic charges and spin densities for the Fe(II)-NO model (BP86).

Table S5. Atomic charges and spin densities for the Fe(II)-NO model (B3LYP).

Table S6. Atomic charges and spin densities for the Fe(II)-NO model (M06L).

Table S7. Atomic charges and spin densities for the Fe(II)-NO model (M06).

Table S8. Atomic charges and spin densities for the Fe(II)-NO model (M06HF).

Table S9. Atomic charges and spin densities for the Fe(II)-NO model (M06-2X).

Table S10. Atomic charges and spin densities for the Fe(II)-NO model (MP2).

Table S11. Computed geometrical parameters for aqua-bound Hemoglobin (BP86).

Table S12. Computed geometrical parameters for all aqua-bound models (M06-2X).

Table S13. Computed geometrical parameters for all aqua-bound models (M06L).

Table S1. Computed geometrical parameters for all dioxygen-bound models (first scanning step//last scanning step) using the M06-2X functional.

| Complex                                                 | Fe-S       | Fe-N <sub>axial</sub> | Fe-O       | O-O        |
|---------------------------------------------------------|------------|-----------------------|------------|------------|
| $S=0$<br>[Fe(Im)(Por)(OO)] <sup>0</sup>                 | -          | 2.03//1.98            | 1.84//3.84 | 1.21//1.20 |
| $S=1$<br>[Fe(Im)(Por)(OO)] <sup>0</sup>                 | -          | 2.06//2.20            | 1.87//4.07 | 1.29//1.19 |
| $S=2$<br>[Fe(Im)(Por)(OO)] <sup>0</sup>                 | -          | 2.38//2.16            | 1.88//3.88 | 1.29//1.19 |
| $S=3$<br>[Fe(Im)(Por)(OO)] <sup>0</sup>                 | -          | 2.32//2.24            | 2.06//3.86 | 1.29//1.21 |
| $S=0$<br>[Fe(SCH <sub>3</sub> )(Por)(OO)] <sup>1-</sup> | 2.37//2.36 | -                     | 1.81//3.41 | 1.24//1.21 |
| $S=1$<br>[Fe(SCH <sub>3</sub> )(Por)(OO)] <sup>1-</sup> | 2.33//2.48 | -                     | 1.92//3.52 | 1.30//1.19 |
| $S=2$<br>[Fe(SCH <sub>3</sub> )(Por)(OO)] <sup>1-</sup> | 2.36//2.41 | -                     | 1.98//3.58 | 1.28//1.19 |
| $S=3$<br>[Fe(SCH <sub>3</sub> )(Por)(OO)] <sup>1-</sup> | 2.47//2.42 | -                     | 2.05//3.65 | 1.30//1.19 |

Table S2. Computed geometrical parameters for all dioxygen-bound models (first scanning step//last scanning step) using the M06L functional.

| Complex                                               | Fe-S       | Fe-N <sub>axial</sub> | Fe-O       | O-O        |
|-------------------------------------------------------|------------|-----------------------|------------|------------|
| S=0<br>[Fe(Im)(Por)(OO)] <sup>0</sup>                 | -          | 2.07//1.89            | 1.75//3.55 | 1.27//1.24 |
| S=1<br>[Fe(Im)(Por)(OO)] <sup>0</sup>                 | -          | 2.01//1.89            | 1.85//3.65 | 1.26//1.22 |
| S=2<br>[Fe(Im)(Por)(OO)] <sup>0</sup>                 | -          | 2.34//2.19            | 1.91//3.71 | 1.27//1.22 |
| S=3<br>[Fe(Im)(Por)(OO)] <sup>0</sup>                 | -          | 2.22//2.13            | 2.19//3.79 | 1.26//1.22 |
| S=0<br>[Fe(SCH <sub>3</sub> )(Por)(OO)] <sup>1-</sup> | 2.33//2.37 | -                     | 1.79//3.59 | 1.28//1.26 |
| S=1<br>[Fe(SCH <sub>3</sub> )(Por)(OO)] <sup>1-</sup> | 2.32//.23  | -                     | 1.90//3.50 | 1.28//1.24 |
| S=2<br>[Fe(SCH <sub>3</sub> )(Por)(OO)] <sup>1-</sup> | 2.42//2.33 | -                     | 2.00//3.60 | 1.28//1.24 |
| S=3<br>[Fe(SCH <sub>3</sub> )(Por)(OO)] <sup>1-</sup> | 2.37//2.33 | -                     | 2.46//3.66 | 1.25//1.24 |

Table S3. Computed geometrical parameters for all dioxygen-bound models (first scanning step//last scanning step) using the BP86 functional.

| Complex                                               | Fe-S       | Fe-N <sub>axial</sub> | Fe-O       | O-O        |
|-------------------------------------------------------|------------|-----------------------|------------|------------|
| S=0<br>[Fe(Im)(Por)(OO)] <sup>0</sup>                 | -          | 2.07//1.86            | 1.75//3.75 | 1.28//1.24 |
| S=1<br>[Fe(Im)(Por)(OO)] <sup>0</sup>                 | -          | 2.02//1.87            | 1.75//3.75 | 1.29//1.23 |
| S=2<br>[Fe(Im)(Por)(OO)] <sup>0</sup>                 | -          | 2.16//2.16            | 1.91//3.71 | 1.28//1.24 |
| S=3<br>[Fe(Im)(Por)(OO)] <sup>0</sup>                 | -          | 2.27//2.11            | 1.92//3.92 | 1.28//1.24 |
| S=0<br>[Fe(SCH <sub>3</sub> )(Por)(OO)] <sup>1-</sup> | 2.32//2.32 | -                     | 1.79//3.59 | 1.30//1.26 |
| S=1<br>[Fe(SCH <sub>3</sub> )(Por)(OO)] <sup>1-</sup> | 2.31//2.21 | -                     | 1.90//3.50 | 1.30//1.25 |
| S=2<br>[Fe(SCH <sub>3</sub> )(Por)(OO)] <sup>1-</sup> | 2.31//2.39 | -                     | 2.00//3.60 | 1.30//1.25 |
| S=3<br>[Fe(SCH <sub>3</sub> )(Por)(OO)] <sup>1-</sup> | 2.36//2.33 | -                     | 2.46//3.66 | 1.26//1.25 |

Table S4. Atomic charges and spin densities for the Fe(II)-NO model (BP86).

|       | Fe spin (charge) | S spin (charge) | NO spin (charge) |
|-------|------------------|-----------------|------------------|
| S=1/2 | 0.55(0.95)       | 0.06(-0.39)     | 0.37(-0.40)      |
| S=3/2 | 1.39(0.97)       | 0.17(-0.50)     | 1.42(-0.38)      |
| S=5/2 | 3.19(1.08)       | 0.19(-0.35)     | 1.31(-0.47)      |

Table S5. Atomic charges and spin densities for the Fe(II)-NO model (B3LYP).

|       | Fe spin (charge) | S spin (charge) | NO spin (charge) |
|-------|------------------|-----------------|------------------|
| S=1/2 | -0.14(0.98)      | 0.02(-0.30)     | 1.08(-0.37)      |
| S=3/2 | 3.87(1.14)       | 1.24(-0.42)     | 0.18(-0.28)      |
| S=5/2 | 3.76(1.08)       | 0.17(-0.40)     | 0.89(-0.24)      |

Table S6. Atomic charges and spin densities for the Fe(II)-NO model (M06L).

|       | Fe spin (charge) | S spin (charge) | NO spin (charge) |
|-------|------------------|-----------------|------------------|
| S=1/2 | 0.43(-0.45)      | 0.04(1.21)      | 0.51(-0.36)      |
| S=3/2 | 4.48(1.33)       | 0.17(-0.50)     | -1.29(-0.32)     |
| S=5/2 | 3.86(1.29)       | 0.25(-0.41)     | 0.70(-0.27)      |

Table S7. Atomic charges and spin densities for the Fe(II)-NO model (M06)

|       | Fe spin (charge) | S spin (charge) | NO spin (charge) |
|-------|------------------|-----------------|------------------|
| S=1/2 | -0.04(0.99)      | 0.03(-0.21)     | 1.00(-0.40)      |
| S=3/2 | 3.98(1.14)       | 0.17(0.42)      | 1.31(-0.11)      |
| S=5/2 | 3.97(1.09)       | 0.19(-0.39)     | 0.66(-0.29)      |

Table S8. Atomic charges and spin densities for the Fe(II)-NO model (M06HF).

|       | Fe spin (charge) | S spin (charge) | NO spin (charge) |
|-------|------------------|-----------------|------------------|
| S=1/2 | -0.91(1.08)      | 0.04(-0.30)     | 1.80(-0.55)      |
| S=3/2 | 1.99(0.99)       | 0.03(-0.55)     | 1.04(0.04)       |
| S=5/2 | 3.93(0.96)       | 0.02(-0.49)     | 0.98(0.03)       |

Table S9. Atomic charges and spin densities for the Fe(II)-NO model (M06-2X).

|       | Fe spin (charge) | S spin (charge) | NO spin (charge) |
|-------|------------------|-----------------|------------------|
| S=1/2 | 0.02(1.12)       | 0.00(-0.47)     | 0.96(-0.11)      |
| S=3/2 | 1.96(0.96)       | 0.04(-0.46)     | 0.99(0.03)       |
| S=5/2 | 3.84(1.04)       | 0.06(-0.51)     | 1.01(0.02)       |

Table S10. Atomic charges and spin densities for the Fe(II)-NO model (MP2).

|       | Fe spin (charge) | S spin (charge) | NO spin (charge) |
|-------|------------------|-----------------|------------------|
| S=1/2 | 0.11(1.30)       | -0.01(-0.57)    | 0.92(-0.06)      |
| S=3/2 | 2.07(1.35)       | -0.03(-0.56)    | 0.89(-0.01)      |
| S=5/2 | 3.96(1.32)       | 0.01(-0.58)     | 0.99(0.02)       |

Table S11. Computed geometrical parameters for aqua-bound Hemoglobin (BP86).

| Complex                                             | Fe-N <sub>axial</sub> | Fe-O |
|-----------------------------------------------------|-----------------------|------|
| S=0<br>[Fe(Im)(Por)(H <sub>2</sub> O)] <sup>0</sup> | 1.91                  | 2.09 |
| S=1<br>[Fe(Im)(Por)(H <sub>2</sub> O)] <sup>0</sup> | 2.22                  | 2.51 |
| S=2<br>[Fe(Im)(Por)(H <sub>2</sub> O)] <sup>0</sup> | 2.16                  | 2.43 |
| S=3<br>[Fe(Im)(Por)(H <sub>2</sub> O)] <sup>0</sup> | 2.17                  | 2.49 |

Table S12. Computed geometrical parameters for all aqua-bound models (M06-2X).

| Complex                                                               | Fe-S | Fe-N <sub>axial</sub> | Fe-O |
|-----------------------------------------------------------------------|------|-----------------------|------|
| $S=0$<br>[Fe(Im)(Por)(H <sub>2</sub> O)] <sup>0</sup>                 | -    | 2.02                  | 2.03 |
| $S=1$<br>[Fe(Im)(Por)(H <sub>2</sub> O)] <sup>0</sup>                 | -    | 2.20                  | 2.29 |
| $S=2$<br>[Fe(Im)(Por)(H <sub>2</sub> O)] <sup>0</sup>                 | -    | 2.17                  | 2.26 |
| $S=3$<br>[Fe(Im)(Por)(H <sub>2</sub> O)] <sup>0</sup>                 | -    | 2.07                  | 2.28 |
| $S=0$<br>[Fe(SCH <sub>3</sub> )(Por)(H <sub>2</sub> O)] <sup>1-</sup> | 2.44 | -                     | 2.16 |
| $S=1$<br>[Fe(SCH <sub>3</sub> )(Por)(H <sub>2</sub> O)] <sup>1-</sup> | 2.47 | -                     | 2.51 |
| $S=2$<br>[Fe(SCH <sub>3</sub> )(Por)(H <sub>2</sub> O)] <sup>1-</sup> | 2.41 | -                     | 2.54 |
| $S=3$<br>[Fe(SCH <sub>3</sub> )(Por)(H <sub>2</sub> O)] <sup>1-</sup> | 2.34 | -                     | 2.54 |

Table S13. Computed geometrical parameters for all aqua-bound models (M06L).

| Complex                                                               | Fe-S | Fe-N <sub>axial</sub> | Fe-O |
|-----------------------------------------------------------------------|------|-----------------------|------|
| $S=0$<br>[Fe(Im)(Por)(H <sub>2</sub> O)] <sup>0</sup>                 | -    | 1.92                  | 2.02 |
| $S=1$<br>[Fe(Im)(Por)(H <sub>2</sub> O)] <sup>0</sup>                 | -    | 2.07                  | 2.23 |
| $S=2$<br>[Fe(Im)(Por)(H <sub>2</sub> O)] <sup>0</sup>                 | -    | 2.13                  | 2.26 |
| $S=3$<br>[Fe(Im)(Por)(H <sub>2</sub> O)] <sup>0</sup>                 | -    | 2.09                  | 2.26 |
| $S=0$<br>[Fe(SCH <sub>3</sub> )(Por)(H <sub>2</sub> O)] <sup>1-</sup> | 2.26 | -                     | 2.16 |
| $S=1$<br>[Fe(SCH <sub>3</sub> )(Por)(H <sub>2</sub> O)] <sup>1-</sup> | 2.41 | -                     | 2.52 |
| $S=2$<br>[Fe(SCH <sub>3</sub> )(Por)(H <sub>2</sub> O)] <sup>1-</sup> | 2.33 | -                     | 2.54 |
| $S=3$<br>[Fe(SCH <sub>3</sub> )(Por)(H <sub>2</sub> O)] <sup>1-</sup> | 2.31 | -                     | 2.54 |
